# Supplementary material for: The Resveratrol Rice DJ526 Callus Significantly Increases the Lifespan of Drosophila (Resveratrol Rice DJ526 Callus for Longevity)
Source: PubMed Central journal article supplement (PMC6567216; doi:10.3390/nu11050983), 2019-04-29
Supplement: nutrients-11-00983-s001.pdf [file nutrients-11-00983-s001.pdf]

## Supplementary Materials

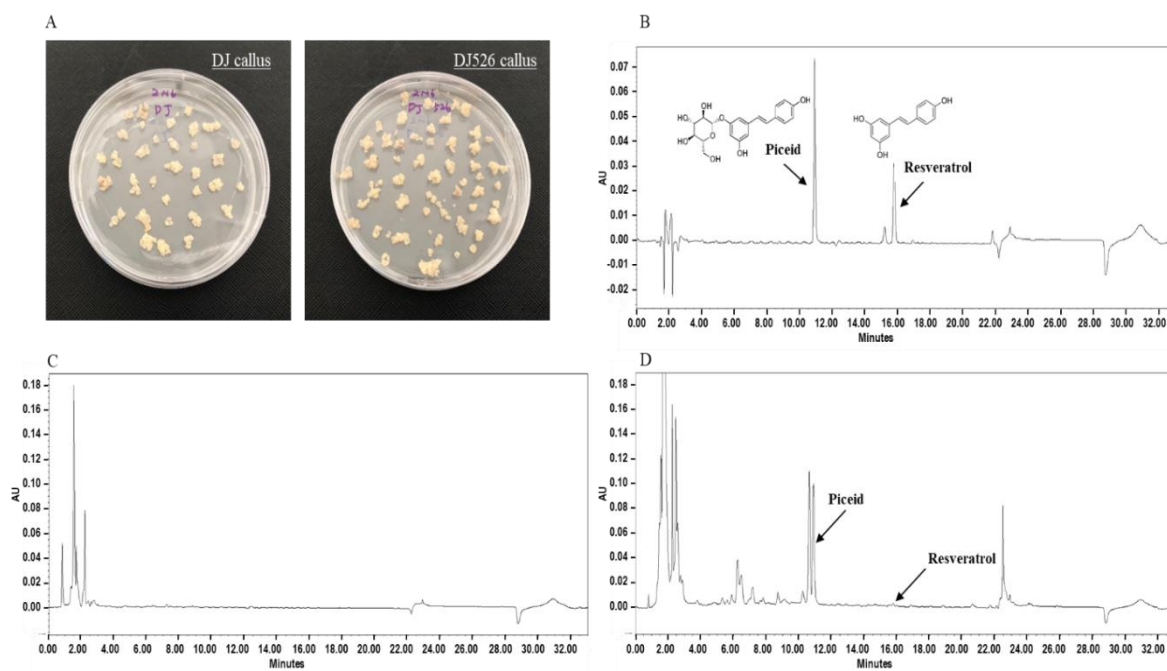

**Figure S1.** A large amount of resveratrol production was achieved by the callus culture of the resveratrol rice DJ526. **(A)** The resveratrol rice DJ526 callus was induced from the seeds of resveratrol rice DJ526 (DJ526) while DJ callus from Dongjin rice (DJ). **(B)** The HPLC chromatogram of the standards of resveratrol, piceid and resveratrol. The HPLC chromatogram of DJ callus **(C)** and HPLC chromatogram of DJ526 callus **(D)**.

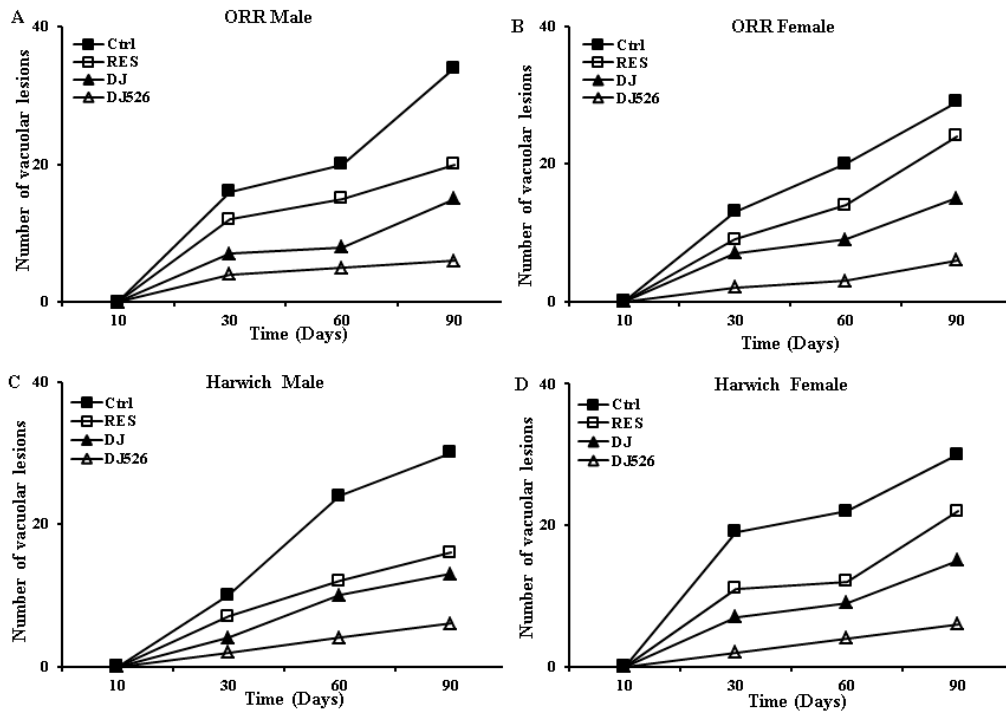

**Figure S2.** The resveratrol rice DJ526 callus decreased the number of vacuolar lesions in the brains of *D. melanogaster* with age progression. (A) ORR male, (B) ORR female, (C) Harwich male, and (D) Harwich female. Ctrl indicates the standard cornmeal diet of *Drosophila*; RES (resveratrol) indicates the standard cornmeal diet supplemented with 5,692.42  $\mu\text{g/L}$  resveratrol, the equivalent amount of resveratrol content in DJ526 media; DJ indicates the diet in which 50% of cornmeal was replaced with the Dongjin callus; and DJ526 indicates the diet in which 50% of cornmeal was replaced with the DJ526 callus (Table S1). The quantification of vacuolar lesions, based on the histological analysis in the brains of *Drosophila* was observed at 10<sup>th</sup>, 30<sup>th</sup>, 60<sup>th</sup> and 90<sup>th</sup> days post-eclosion.

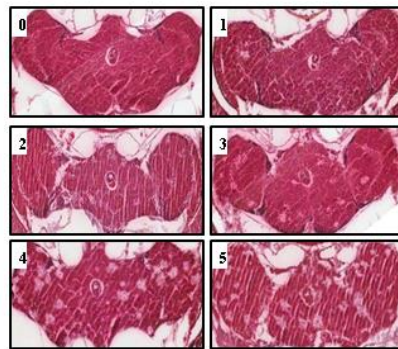

**Figure S3.** Scoring system is developed to quantify neurodegeneration. Each individual brain examined was scored from 0 to 5 based on the severity of the neurodegeneration by counting the number of vacuolar lesions as well as their sizes. Higher score indicates a more severe neurodegeneration. Representative paraffin sections corresponding to each score are given: 0, 1 normal to low; 2, 3 moderate; 4, 5 strong to severe.

**Table S1.** The composition of the media in this study.

| <b>Ingredient</b>                     | <b>Ctrl</b> | <b>RES</b> | <b>DJ</b> | <b>DJ526</b> |
|---------------------------------------|-------------|------------|-----------|--------------|
| Corn meal (g/L)                       | 84          | 83.99      | 42        | 42           |
| Yeast (g/L)                           | 24          | 24         | 24        | 24           |
| Sucrose (g/L)                         | 47          | 47         | 47        | 47           |
| Agar (g/L)                            | 8           | 8          | 8         | 8            |
| Molasses (ml/L)                       | 25          | 25         | 25        | 25           |
| 10% Methyl parahydroxybenzoate (ml/L) | 10          | 10         | 10        | 10           |
| Propionic acid (ml/L)                 | 4           | 4          | 4         | 4            |
| Resveratrol ( $\mu\text{g/L}$ )       | 0           | 5692.42    | 0         | 0            |
| DJ callus (g/L)                       | 0           | 0          | 42        | 0            |
| DJ526 callus (g/L)                    | 0           | 0          | 0         | 42           |
